# Supplementary material for: An ICP-MS-Based Analytical Strategy for Assessing Compliance with the Ban of E 171 as a Food Additive on the EU Market
Source: MDPI journal article supplement (doi:10.3390/nano13222957), 2023-11-15
Supplement: s1 [file s1]

# An ICP-MS-Based Analytical Strategy for Assessing Compliance with the Ban of E 171 as a Food Additive on the EU Market

Francesca Ferraris <sup>1</sup>, Carlos Adelantado <sup>2</sup>, Andrea Raggi <sup>1</sup>, Sara Savini <sup>1,†</sup>, Mohammed Zougagh <sup>3,4</sup>, Ángel Ríos <sup>3,4</sup> and Francesco Cubadda <sup>1,\*</sup>

<sup>1</sup> National Reference Laboratory for Nanomaterials in Food, Department of Food Safety, Nutrition and Veterinary Public Health, Istituto Superiore di Sanità—National Institute of Health, 00161 Rome, Italy; francesca.ferraris@iss.it (F.F.); andrea.raggi@iss.it (A.R.); sara.savini7@gmail.com (S.S.)

<sup>2</sup> Flemish Institute for Technological Research (VITO), 2400 Mol, Belgium; carlos.adelantadosanchez@vito.be

<sup>3</sup> Department of Analytical Chemistry and Food Technology, University of Castilla-La Mancha, 13071 Ciudad Real, Spain; mohammed.zougagh@uclm.es (M.Z.); angel.rios@uclm.es (Á.R.)

<sup>4</sup> Regional Institute for Applied Scientific Research, IRICA, 13005 Ciudad Real, Spain

\* Correspondence: francesco.cubadda@iss.it

† Affiliation at time of study.

## Materials and Methods

**Table S1.** Description of the items, i.e. food supplements and foods, analyzed in this study.

| Sample                         | Label                                                                                                                                                                                                                                                                                                                                                                                                                                                                                                                                                                                                                                                                                                                                    |
|--------------------------------|------------------------------------------------------------------------------------------------------------------------------------------------------------------------------------------------------------------------------------------------------------------------------------------------------------------------------------------------------------------------------------------------------------------------------------------------------------------------------------------------------------------------------------------------------------------------------------------------------------------------------------------------------------------------------------------------------------------------------------------|
| Food Supplements               |                                                                                                                                                                                                                                                                                                                                                                                                                                                                                                                                                                                                                                                                                                                                          |
| Valerian supplement (tablets)  | Bulking agent: Microcrystalline cellulose; Valerian ( <i>Valeriana officinalis</i> L.) root d.e. tit. (0.4%) Valerenic acid, bulking agent: Calcium phosphate; coating agent: Hydroxypropyl methylcellulose; anti-caking agents: Cross-linked sodium carboxymethylcellulose Silicon dioxide, Vegetable magnesium stearate; dye: Titanium dioxide; anti-caking agent: Vegetable stearic acid; colour: Chlorophyllin-copper complexes                                                                                                                                                                                                                                                                                                      |
| Melatonin supplement (tablets) | Bulking agents: Microcrystalline cellulose; Calcium phosphate; Passion flower ( <i>Passiflora incarnata</i> L.) aerial part d.e. tit. (4%) Flavonoids, Valerian ( <i>Valeriana officinalis</i> L.) root d.e. tit. (0.4%) Valerenic acid, lemon balm ( <i>Melissa officinalis</i> L.) aerial part d.e. tit. (5%) Rosmarinic acid, Freshwater pollen ( <i>Eschscholtzia californica</i> Cham.) aerial part d.e. (0.35%) Alkaloids, anti-caking agent: Crosslinked sodium carboxymethylcellulose; coating agent: Hydroxypropyl methylcellulose, anti-caking agents: Silicon dioxide, Vegetable magnesium stearate; colouring: Titanium dioxide anti-caking agent: Vegetable stearic acid; Melatonin, colour: Chlorophyllin-copper complexes |
| Multi-B supplement (tablets)   | Bulking agents: Microcrystalline cellulose, Calcium phosphate; Nicotinamide (vitamin PP), Calcium D-pantothenate (Pantothenic acid), Pyridoxine hydrochloride (Vitamin B6), glazing agent: Hydroxypropyl methylcellulose; Riboflavin (Vitamin B2), Thiamine monohydrate (Vitamin B1), anti-caking agent: Vegetable magnesium stearate; Cyanocobalamin (Vitamin B12), anti-caking agent: Silicon dioxide; dye: Titanium dioxide; anti-caking agent: Vegetable stearic acid; Pteroyl-monoglutamic acid (Folic acid), colours: Yellow iron oxide, Red iron oxide                                                                                                                                                                            |

|                                      |                                                                                                                                                                                                                                                                                                                                                                                                                                                                                                                                                                                              |
|--------------------------------------|----------------------------------------------------------------------------------------------------------------------------------------------------------------------------------------------------------------------------------------------------------------------------------------------------------------------------------------------------------------------------------------------------------------------------------------------------------------------------------------------------------------------------------------------------------------------------------------------|
| Soy-isoflavones supplement (tablets) | Calcium carbonate, bulking agent: Microcrystalline cellulose; SOY (Glycine max L.) seeds d.e. tit. (40%) Isoflavones, DL-alpha-tocopheryl acetate (Vitamin E), stabilizer: Polyvinylpyrrolidone, glazing agent: Hydroxypropyl methylcellulose; anti-caking agents: Crosslinked sodium carboxymethyl cellulose, Vegetable magnesium stearate, Silicon dioxide; Pyridoxine hydrochloride (Vitamin B6), Cholecalciferol (Vitamin D3), Cyanocobalamin (Vitamin B12), colour: Titanium dioxide, anti-caking agent: Vegetable stearic acid, Pteroyl-monoglutamic acid (Folate), colour: Iron oxide |
| Probiotics supplement (powder)       | Sweetener: Sorbitol, (from corn or wheat), Fructo-oligosaccharides, Lactobacillus acidophilus R52 (contains milk derivatives), Bifidobacterium lactis BCL-01, anti-caking agent: Silicon dioxide, sweetener: Sucralose                                                                                                                                                                                                                                                                                                                                                                       |

---

## Food

---

|                          |                                                                                                                                                                                                                                                                                                                                                                                                                                                                                                                                                                                                               |
|--------------------------|---------------------------------------------------------------------------------------------------------------------------------------------------------------------------------------------------------------------------------------------------------------------------------------------------------------------------------------------------------------------------------------------------------------------------------------------------------------------------------------------------------------------------------------------------------------------------------------------------------------|
| High protein cappuccino  | Milk proteins (emulsifier: Sunflower lecithin), Skimmed milk powder (10.7%), Soluble coffee (6%), Low-fat cocoa, powder (2.6%), Flavouring, Wheat fibres, Salt, Vegetable oil (Palm oil), anti-caking agents: Potassium and Magnesium carbonate, thickeners: Guar and Xanthan gum and Locust bean gum, colour: Titanium dioxide, Vitamins (C, B3, E, B5, B6, B2, B1, A , B9, B8, B12), Maltodextrin, Lactose, sweeteners: Sucralose. optional statement (processing aid): Silicon dioxide [nano] Contains: Milk, Gluten (Wheat)                                                                               |
| Croissant                | Soft wheat flour, Fresh milk cream (25%) [Glucose syrup, Sugar, Water, Pasteurized fresh milk (10% in the cream, corresponding to 2.5% of the total), Vegetable palm fat, Skimmed milk powder, Flavourings, thickeners: Pectin, colourings: E171, preservatives: Potassium sorbate], Vegetable margarine (Palm fat, Water, Sunflower oil), Sugar, Fresh eggs (4.8%), Natural yeast (Gluten), Cereal flour (2.5%) (Oats, rice, Barley, Spelled, Buckwheat), emulsifiers: Mono-and diglycerides of fatty acids, Skimmed milk powder, Salt, Flavourings, Malted barley flour. May contain traces of nuts and soy |
| Dark chocolate chips 1   | Cocoa paste, Sugar, Cocoa butter, emulsifier: Lecithins (soy). Cocoa (48%) minimum. May contain traces of milk.                                                                                                                                                                                                                                                                                                                                                                                                                                                                                               |
| Dark chocolate chips 2   | Cane sugar, Cocoa paste, Cocoa butter, emulsifier: Lecithins (soy), Natural Vanilla flavouring                                                                                                                                                                                                                                                                                                                                                                                                                                                                                                                |
| Fair trade chocolate bar | Dark chocolate coating: Cane sugar, Cocoa paste, Cocoa butter, emulsifier: Soy Lecithin, Natural Vanilla flavour. Cocoa (48%) min. Orange flavored cream filling: Cane sugar, Vegetable oil and fats (Cocoa butter and Sunflower oil), Whey, Lactose, Skimmed milk powder, Emulsifier: Soy Lecithin, Flavouring                                                                                                                                                                                                                                                                                               |
| Dark chocolate bar 1     | Cocoa paste, Sugar, Cocoa butter, Low fat cocoa, Natural flavor. Cocoa (72%) minimum                                                                                                                                                                                                                                                                                                                                                                                                                                                                                                                          |
| Dark chocolate bar 2     | Cocoa paste, Cane sugar, Cocoa butter, Emulsifiers: Soy Lecithin, Ground Vanilla, *Organic, may contain traces of Nuts, Lactose and Milk proteins, Cocoa, cane sugar, vanilla (99.6%)                                                                                                                                                                                                                                                                                                                                                                                                                         |
| Milk and chocolate snack | Sugar, Vegetable oils and fats (cocoa butter, sunflower oil, coconut oil), Type 0 soft wheat flour, Glucose-fructose syrup, Eggs, Milk powder 6.1%, Skimmed milk 5.5%, Skimmed cocoa powder 4.1%, Milk 3.6%, Skimmed milk powder 2.5%, Butter, Milk proteins, Flavourings, Emulsifiers: Mono- and Diglycerides of fatty acids, Soy Lecithin, raising agents: Acid carbonate sodium, Ammonium hydrogen carbonate, Diphosphates, Salt, thickener: Pectin, may contain traces of Hazelnuts and other Nuts                                                                                                        |

|                           |                                                                                                                                                                                                                                                                                                                                                                                                                                             |
|---------------------------|---------------------------------------------------------------------------------------------------------------------------------------------------------------------------------------------------------------------------------------------------------------------------------------------------------------------------------------------------------------------------------------------------------------------------------------------|
| Cream ice-cream           | Rehydrated skimmed milk, Glucose-fructose syrup, Sugar, Coconut oil, Concentrated butter, Glucose syrup, Cream (3.5%), Lactose and Milk proteins, Skimmed cocoa powder, Cocoa mass, Emulsifiers (mono- and diglycerides of fatty acids, ammonium phosphatides, SOY lecithin), Thickeners (Locust bean gum, Guar gum, Carrageenan), Flavourings, Cocoa butter, Colors (Iron oxide and hydroxide, Titanium dioxide), Glazing agents (Shellac) |
| White chocolate chips 1   | Cane sugar, Whole milk powder (24%), Cocoa butter (21%), Skimmed milk powder, Emulsifier Lecithins (Soy), Natural vanilla flavor                                                                                                                                                                                                                                                                                                            |
| White chocolate chips 2   | Sugar, Whole milk powder, Cocoa butter, Skimmed milk powder, Emulsifier Lecithins (Soy), Natural vanilla flavor                                                                                                                                                                                                                                                                                                                             |
| White chocolate bar 1     | Sugar; Cocoa butter; Powdered milk; Emulsifier: Lecithins (Soy)                                                                                                                                                                                                                                                                                                                                                                             |
| White chocolate bar 2     | Cane sugar, Cocoa butter, Milk powder (28%), Emulsifiers: Lecithins (Soy), Ground vanilla, Organic, may contain traces of Nuts, Cocoa, cane sugar, Vanilla (71.5%)                                                                                                                                                                                                                                                                          |
| Vanilla and cocoa dessert | Glucose syrup, Skimmed milk powder, Lactose and Milk proteins, Emulsifiers: Mono- and Diglycerides of fatty acids, Thickeners: sodium alginate, Gelatin, Natural vanilla flavor (0.07%), Flavourings, may contain traces of Egg and Nuts, Rehydrated skimmed milk, Skimmed cocoa coating (11%) (Vegetable oils (Coconut oil, Sunflower oil), Sugar, Skimmed cocoa powder (15.9%), emulsifier: Lecithins (Soy)) , Sugar, Coconut oil         |
| Cappuccino powder         | Skimmed milk powder (31%), Sugar (26%), Glucose syrup, Instant coffee (14%), Coconut fat, Stabiliser: sodium phosphate                                                                                                                                                                                                                                                                                                                      |

| Sample name              | E 171 labelling |
|--------------------------|-----------------|
| Valerian supplement      | Y               |
| Melatonin supplement     | Y               |
| High protein cappuccino  | Y               |
| Croissant                | Y               |
| Dark chocolate chips 1   | N               |
| Fair trade chocolate bar | N               |
| White chocolate chips 1  | N               |
| Cappuccino powder        | N               |

**Table S3.** Titanium concentrations ( $\mu\text{g g}^{-1}$ ) obtained in single quad mode (SQ) for the isotopes more affected by spectral interferences. All the samples were submitted to MW-assisted acid digestion with the use of HF. (Y/N indicates if E 171 was reported on the item label).

|                            |   |   |      |      |       |      |       |      |
|----------------------------|---|---|------|------|-------|------|-------|------|
| Melatonin supplement       | Y | 3 | 2173 | 125  | 2335  | 34   | 2440  | 86   |
| Valerian supplement        | Y | 3 | 3572 | 140  | 3611  | 134  | 3773  | 132  |
| Soy-isoflavones supplement | Y | 3 | 1352 | 152  | 1380  | 161  | 1465  | 150  |
| Multi-B supplement         | Y | 3 | 1876 | 190  | 2073  | 148  | 2013  | 130  |
| <b>Food</b>                |   |   |      |      |       |      |       |      |
| Croissant                  | Y | 5 | 881  | 303  | 900   | 294  | 918   | 299  |
| High protein cappuccino    | Y | 3 | 3075 | 93   | 3051  | 63   | 3096  | 50   |
| Cappuccino powder          | N | 4 | 2.87 | 0.28 | 11.55 | 0.91 | 17.81 | 0.86 |
| Fair trade chocolate bar   | N | 3 | 4.29 | 0.56 | 7.23  | 0.65 | 6.93  | 0.62 |
| Dark chocolate chips 1     | N | 3 | 6.70 | 0.88 | 13.05 | 1.13 | 9.40  | 1.15 |
| White chocolate chips 1    | N | 3 | 4.20 | 1.46 | 8.24  | 0.98 | 12.35 | 1.23 |
| Dark chocolate bar 2       | N | 3 | 3.14 | 0.34 | 10.46 | 0.33 | 6.10  | 0.49 |
| Dark chocolate bar 1       | N | 3 | 3.29 | 0.19 | 10.98 | 0.96 | 6.05  | 0.35 |
| White chocolate chips 2    | N | 3 | 4.25 | 1.42 | 8.09  | 0.96 | 11.28 | 0.92 |
| Dark chocolate chips 2     | N | 3 | 4.44 | 0.43 | 10.26 | 0.61 | 6.82  | 0.45 |
| White chocolate bar 1      | N | 3 | 2.41 | 0.14 | 6.02  | 0.91 | 10.85 | 0.92 |
| White chocolate bar 2      | N | 3 | 2.31 | 0.05 | 7.31  | 0.44 | 12.12 | 0.21 |
| Milk and chocolate snack   | N | 5 | 4.81 | 0.76 | 9.45  | 1.33 | 8.85  | 0.78 |
| Vanilla and cocoa dessert  | N | 3 | 3.21 | 0.42 | 4.63  | 0.33 | 6.05  | 0.45 |
| Cream ice-cream            | Y | 3 | 2.81 | 1.16 | 4.86  | 1.23 | 7.85  | 1.37 |

**Table S4.** Precision, expressed as coefficient of variation (%) for repeatability and reproducibility. Repeatability was calculated by analyzing 5 times the same sample, i.e. SRM 3280, intra-day. Reproducibility was evaluated in the same manner on three different days.

|                        | <sup>49</sup> Ti [SQ] | <sup>50</sup> Ti [SQ] | 49 -> 49 Ti<br>[MS/MS No<br>Gas] | 50 -> 50 Ti<br>[MS/MS No<br>Gas] | 47 -> 149 Ti<br>[MS/MS,<br>NH <sub>3</sub> ] | 48 -> 150 Ti<br>[MS/MS,<br>NH <sub>3</sub> ] |
|------------------------|-----------------------|-----------------------|----------------------------------|----------------------------------|----------------------------------------------|----------------------------------------------|
| <b>Repeatability</b>   | 1.2                   | 1.1                   | 0.8                              | 0.3                              | 1.1                                          | 1.1                                          |
| <b>Reproducibility</b> | 1.1                   | 2.0                   | 2.1                              | 1.1                              | 2.9                                          | 3.0                                          |

**Table S5.** LODs (LOQs) achieved, based on the 3 $\sigma$  (6 $\sigma$ ) criterion where  $\sigma$  is the standard deviation of the measurement of 20 method blanks. NG means no reaction gas used in MS/MS mode.

|                             | <sup>49</sup> Ti [SQ] | <sup>50</sup> Ti [SQ] | 49 -> 49 Ti<br>[MS/MS NG] | 50 -> 50 Ti<br>[MS/MS NG] | 47 -> 149 Ti<br>[MS/MS,<br>NH <sub>3</sub> ] | 48 -> 150 Ti<br>[MS/MS,<br>NH <sub>3</sub> ] |
|-----------------------------|-----------------------|-----------------------|---------------------------|---------------------------|----------------------------------------------|----------------------------------------------|
| Ti ( $\mu\text{g g}^{-1}$ ) |                       |                       |                           |                           |                                              |                                              |
| LOD                         | 0.26                  | 0.07                  | 0.25                      | 0.06                      | 0.04                                         | 0.04                                         |
| LOQ                         | 0.53                  | 0.14                  | 0.49                      | 0.13                      | 0.09                                         | 0.08                                         |

**Table S6.** Found total titanium concentration ( $\mu\text{g g}^{-1}$ ) in the reference material NIST 3280 using different amounts of HF in the MW-assisted acid digestion. The recovery was calculated on the reference mass fraction of  $5400 \pm 300$  ( $\mu\text{g g}^{-1}$ ). NG means no reaction gas used in MS/MS mode [48].

| <sup>49</sup> Ti [SQ]    |      |     |             | <sup>50</sup> Ti [SQ] |     |             | 49 -> 49 Ti<br>[MS/MS NG] |     |             | 50 -> 50 Ti<br>[MS/MS NG] |     |             | 47 -> 149 Ti<br>[MS/MS, NH <sub>3</sub> ] |     |             | 48 -> 150 Ti<br>[MS/MS, NH <sub>3</sub> ] |     |             |
|--------------------------|------|-----|-------------|-----------------------|-----|-------------|---------------------------|-----|-------------|---------------------------|-----|-------------|-------------------------------------------|-----|-------------|-------------------------------------------|-----|-------------|
| Ti (μg g <sup>-1</sup> ) |      |     |             |                       |     |             |                           |     |             |                           |     |             |                                           |     |             |                                           |     |             |
| HF<br>(mL)               | Mean | SD  | Rec.<br>(%) | Mean                  | SD  | Rec.<br>(%) | Mean                      | SD  | Rec.<br>(%) | Mean                      | SD  | Rec.<br>(%) | Mean                                      | SD  | Rec.<br>(%) | Mean                                      | SD  | Rec.<br>(%) |
| 0.75                     | 4222 | 110 | 78          | 4190                  | 95  | 78          | 4185                      | 99  | 77          | 4235                      | 123 | 78          | 4468                                      | 83  | 83          | 4529                                      | 89  | 84          |
| 1.00                     | 4348 | 317 | 81          | 4323                  | 318 | 80          | 4360                      | 254 | 81          | 4433                      | 262 | 82          | 4578                                      | 287 | 85          | 4617                                      | 307 | 85          |
| 1.25                     | 4665 | 132 | 86          | 4637                  | 117 | 86          | 4624                      | 107 | 86          | 4695                      | 100 | 87          | 4885                                      | 174 | 90          | 4922                                      | 186 | 91          |
| 1.50                     | 4547 | 177 | 84          | 4525                  | 159 | 84          | 4524                      | 138 | 84          | 4579                      | 187 | 85          | 4750                                      | 203 | 88          | 4789                                      | 156 | 89          |
